# Supplementary material for: Review article: Drought as a continuum: memory effects in interlinked hydrological, ecological, and social systems
Source: Copernicus journal article supplement (doi:10.5194/egusphere-2024-421), 2024-02-20
Supplement: Supplementary file [file egusphere-2024-421-AC1-supplement.pdf]

## *APPENDIX 1 - Case study Chile*

C. Alvarez-Garreton, J.P. Boisier, R. Garreaud, M. Galleguillos

1600 Central-south Chile (30°–37°S) is a narrow strip of land (<200 km wide) between the Pacific Ocean and the Andes cordillera, home to more than 9 Mill inhabitants and many economical activities. It features an archetypical Mediterranean climate, with semi-arid conditions (annual precipitation of 100 to 1000 mm/year), strong seasonality (>70% of the precipitation in austral winter: JJA) and large interannual variability. The Andes cordillera is more than 4 km high here and enhances precipitation, most of which is retained as seasonal snowpack.

1605 The megadrought afflicting this region started in 2010 and continues up to date, featuring mean precipitation deficits of 30% with some extreme dry years reaching up to 80% (2019 and 2021, as observed in Figure A.1.b). Such a long dry spell, partly attributed to anthropogenic climate change (Boisier et al., 2016, 2018), has been the driest decade in local history since the 14th century (Garreaud et al., 2017), and its impacts reveal key memory effects within different subsystems.

### **Hydrological system**

1610 Before the megadrought, precipitation variability in central Chile featured mostly dry years (below average) interrupted with a few very wet years that permitted the recovery of the hydrological system and natural vegetation. Such recovery capacity has been absent in the last 12 years (Figure A.1.b). During the megadrought, snow-dominated headwater basins with large memory have accumulated the effects of precipitation deficits and generated on average 30% less streamflow than previous single year droughts (Alvarez-Garreton et al., 2021). In some cases, this effect has overlapped with water extractions for  
1615 human activities in downstream sections, leading to an amplification of drought signal over lowlands and the drying out of water bodies (Barría et al., 2021b; Muñoz et al., 2020).

It remains unclear how long it will take for these new hydrological states to recover after the megadrought finishes. These recovery times depend on the subsystems memory, as illustrated in Figure A.1. For example, a small reservoir (La Paloma, with 0.75 km<sup>3</sup> capacity) had a 80% volume recovery after the year 2016, where precipitation had a slight increase compared  
1620 to the rest of the decade. On the other hand, the large Laja lake (5.6 km<sup>3</sup> capacity) recovered less than 20% in volume during that time.

A similar effect happens at the basin scale. In short memory pluvial basins water supply is more strongly dependent on the meteorological conditions of the current year, and thus a wet year would lead to a faster recovery than in long-memory snow-dominated or groundwater-dominated basins, or where groundwater has been disconnected from shallower water  
1625 during the megadrought. The challenge is that most of these long-memory catchments correspond to semi-arid basins in central Chile where irrigated agriculture is concentrated. In those cases, water needs are usually met by exploiting groundwater reservoirs in unsustainable ways, leading to sustained water level depletions as those observed in Maipo, Aconcagua and Rapel (Figure A.1.e). The unsustainable use of groundwater in central Chile is already impacting society and

ecosystems, and posing an intergenerational dilemma due to the depletion of reserves that will not be recovered within  
 1630 generational time frames (Alvarez-Garreton et al., 2023a; Duran-Llacer et al., 2020; Jódar et al., 2024; Taucare et al., 2024).

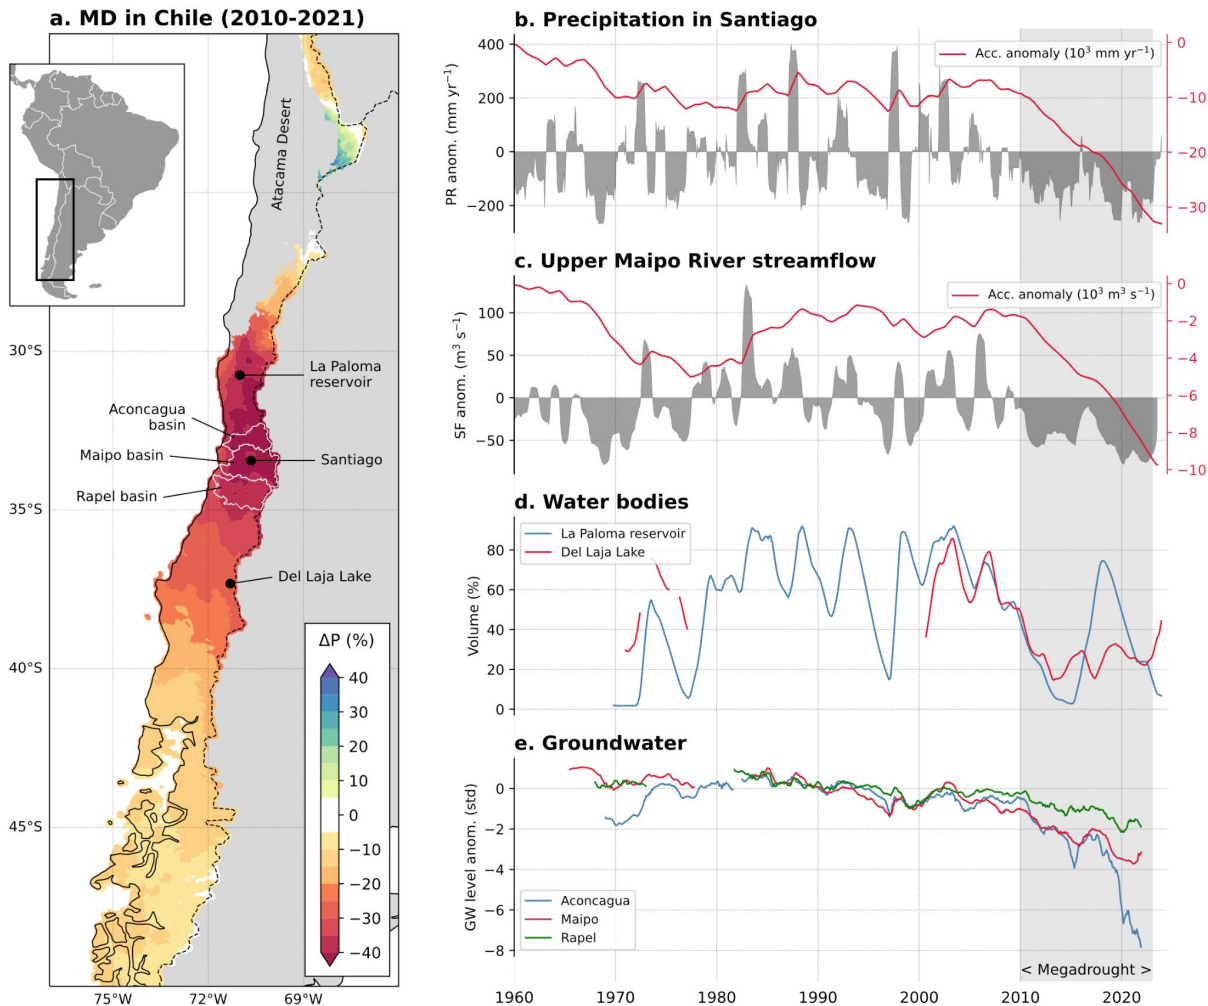

**Figure A1: Megadrought in Chile:** a) 2010-2021 mean annual precipitation anomaly in Chile, with respect to the 1980-2010 period (data source: CR2MET, (Boisier, 2023)). b) Monthly precipitation anomaly (12-month running sum) and accumulated precipitation anomaly in Santiago (Quinta Normal station, DMC). c) Monthly streamflow anomaly (12-month running mean) and accumulated streamflow anomaly in the Upper Maipo River (El Manzano station, DGA). d) Monthly water volume level (12-month running mean) in La Paloma Reservoir and Del Laja Lake (DGA). e) Groundwater level anomalies in the Aconcagua, Maipo, and Rapel watersheds (indices based on averaged standardized anomalies from 54, 70, and 49 observation wells, respectively).

1640

## **Ecosystem**

According to satellite observations, natural ecosystems have experienced significant vegetation browning following the extreme hyper-dry year of 2019 (Miranda et al., 2023). In the field, there has been mortality of less drought-tolerant tree species, the complete drying out of several branches and even the trunk of more resilient species. The more resilient species  
1645 have resprouted in the year following the hyper-drought following a vegetative regeneration strategy. These drought effects have led to the lack of seedlings that depicts a risk of altering the composition and structure of these plant communities over time.

The dry conditions during the megadrought have been related to a higher occurrence of wildfires, as well as a larger burned area. Before the megadrought, wildfires were concentrated between the months of November and April, but now they extend  
1650 from October to May, increasing the occurrence period from 6 to 8 months. Over 70% of the megafires reported in Chile have occurred between 2010 and 2018, where 50% of the burned area corresponds to industrial tree plantations. Notwithstanding this, it is worth noting that 99% of wildfires in Chile are initiated by human actions, whether they are accidental or intentional. Therefore, the behavior of the population is crucial in preventing and mitigating wildfires (González et al., 2018).

## **1655 Social system**

Some parts of the country have precarious water infrastructure, particularly in rural areas, where there are problems of water access even during wet periods. In this context, the megadrought has impacted a system that was already vulnerable before 2010, and these impacts have not diminished over time. This has led to an environment of increasing discomfort in rural communities. Several assessments of water management in Chile have concluded that the strategies to face drought impacts  
1660 are reactive and tackle water scarcity in the short term, without an adequate plan for persistent drought conditions (Alvarez-Garretón et al., 2023c).

The vulnerability of social systems varies across sectors. In rural areas, people rely on self-organized communities with inadequate infrastructure and technical capacities for providing subsistence drinking water, leading to water cuts that have been remedied by cistern trucks, which is a non-structural reactive measure to address permanent water access requirements  
1665 in rural communities (Nicolas-Chloé et al., 2022).

On the other hand, people in urban areas rely on water sanitation companies and have not been affected by water shortages, even when surface reservoirs have been significantly depleted since these companies have adequate groundwater infrastructure. An important adaptive measure taken by governmental agencies to face water scarcity in Santiago has been to build deep pumping wells for supplying drinking water for human consumption. This measure reveals that groundwater is  
1670 seen as an additional water source, overlooking the fact that these reserves are limited by recharge rates, and that current withdrawals are already exceeding those rates (Alvarez-Garretón et al., 2023a; Duran-Llacer et al., 2020; Jódar et al., 2024;

Taucare et al., 2024). In this context, some sectors are not experiencing the consequences of a decade-long megadrought, causing overreliance on a system that has critical vulnerabilities.

1675 From a broader perspective, the slow adaptation of policies to non-stationarity climatic and hydrological processes makes the  
water management system inadequate to face the drying trends projected for Chile. For example, most of the current water  
use rights were allocated as absolute flows based on the water availability from decades ago and, in seeking to provide legal  
certainty, the law does not permit to modify these allocated flows considering the current and projected climatic conditions  
(Barria et al., 2019; Barria et al., 2021a). This prohibition has led to overallocation of water use rights, as well as impeding  
the protection of environmental flows, and thus threatening the opportunity to reach water security (Alvarez-Garreton et al.,  
1680 2023b).

## Management

Climate projections for this region show a consistent decrease in precipitation, which may exacerbate current drought  
impacts in the following decades. Water management measures should prepare for these projections, advancing from the  
reactive approach currently adopted. Recent studies have provided specific recommendations to achieve this, including the  
1685 following:

- 1) Adapting the water management system to account for a changing climate (Barría et al., 2019, 2021a).
- 2) To recognize that groundwater savings are not an independent source of additional water availability (Alvarez-Garreton et al., 2023a).
- 1690 3) Strengthening the protection of environmental flows to avoid over allocation of water use rights and advance  
towards water security (Alvarez-Garreton et al., 2023b).

## References

- Alvarez-Garreton, C., Pablo Boisier, J., Garreaud, R., Seibert, J. and Vis, M.: Progressive water deficits during multiyear  
droughts in basins with long hydrological memory in Chile, *Hydrol. Earth Syst. Sci.*, 25(1), 429–446, doi:10.5194/hess-  
25-429-2021, 2021.
- 1695 Alvarez-Garreton, C., Boisier, J. P., Garreaud, R., González, J., Rondanelli, R., Gayó, E. and Zambrano-Bigiarini, M.: HESS  
Opinions: The unsustainable use of groundwater conceals a “Day Zero,” *Hydrol. Earth Syst. Sci. Discuss.*, 2023, 1–16,  
doi:10.5194/hess-2023-245, 2023a.
- Alvarez-Garreton, C., Boisier, J. P., Billi, M., Lefort, I., Marinao, R. and Barría, P.: Protecting environmental flows to  
achieve long-term water security, *J. Environ. Manage.*, 328(December 2022), 116914,  
1700 doi:10.1016/j.jenvman.2022.116914, 2023b.
- Alvarez-Garreton, C., Boisier, J. P., Blanco, G., Billi, M., Nicolas-Artero, C., Maillet, A., Aldunce, P., Urrutia-Jalabert, R.,  
Zambrano-Bigiarini, M., Guevara, G., Galleguillos, M., Muñoz, A., Christie, D., Marinao, R. and Garreaud, R.:  
Seguridad Hídrica en Chile: Caracterización y Perspectivas de Futuro. Centro de Ciencia del Clima y la Resiliencia CR2

(ANID/FONDAP/1522A0001). [online] Available from: [www.cr2.cl/seguridadhidrica](http://www.cr2.cl/seguridadhidrica), 2023c.

- 1705 Barría, P., Rojas, M., Moraga, P., Muñoz, A., Bozkurt, D. and Alvarez-Garreton, C.: Anthropocene and streamflow: Long-term perspective of streamflow variability and water rights, *Elementa*, 7(2), 1–18, doi:10.1525/elementa.340, 2019.
- Barría, P., Sandoval, I. B., Guzman, C., Chadwick, C., Alvarez-Garreton, C., Díaz-Vasconcellos, R., Ocampo-Melgar, A. and Fuster, R.: Water allocation under climate change: A diagnosis of the Chilean system, *Elementa*, 9(1), 1–20, doi:10.1525/elementa.2020.00131, 2021a.
- 1710 Barría, P., Chadwick, C., Ocampo-Melgar, A., Galleguillos, M., Garreaud, R., Díaz-Vasconcellos, R., Poblete, D., Rubio-Álvarez, E. and Poblete-Caballero, D.: Water management or megadrought: what caused the Chilean Aculeo Lake drying?, *Reg. Environ. Chang.*, 21, 19, doi:10.1007/s10113-021-01750-w, 2021b.
- Boisier, J. P.: CR2MET: A high-resolution precipitation and temperature dataset for the period 1960-2021 in continental Chile., [Data set]. Zenodo, doi:10.5281/zenodo.7529682, 2023.
- 1715 Boisier, J. P., Rondanelli, R., Garreaud, R. D. and Muñoz, F.: Anthropogenic and natural contributions to the Southeast Pacific precipitation decline and recent megadrought in central Chile, *Geophys. Res. Lett.*, 43(1), 413–421, doi:10.1002/2015GL067265, 2016.
- Boisier, J. P., Rondanelli, R., Garreaud, R. D., Muñoz, F., Alvarez-Garreton, C., Cordero, R. R., Damiani, A., Gallardo, L., Garreaud, R. D., Lambert, F., Ramallo, C., Rojas, M. and Rondanelli, R.: Anthropogenic drying in central-southern Chile evidenced by long-term observations and climate model simulations, *Elem. Sci. Anthr.*, 6(1), 74, doi:10.1525/elementa.328, 2018.
- 1720 Duran-Llacer, I., Munizaga, J., Arumí, J. L., Ruybal, C., Aguayo, M., Sáez-Carrillo, K., Arriagada, L. and Rojas, O.: Lessons to be learned: Groundwater depletion in Chile's ligua and petorca watersheds through an interdisciplinary approach, *Water (Switzerland)*, 12, 2446, doi:10.3390/w12092446, 2020.
- 1725 Garreaud, R. D., Alvarez-Garreton, C., Barichivich, J., Pablo Boisier, J., Christie, D., Galleguillos, M., LeQuesne, C., McPhee, J. and Zambrano-Bigiarini, M.: The 2010-2015 megadrought in central Chile: Impacts on regional hydroclimate and vegetation, *Hydrol. Earth Syst. Sci.*, 21(12), 6307–6327, doi:10.5194/hess-21-6307-2017, 2017.
- González, M. E., Gómez-González, S., Lara, A., Garreaud, R. and Díaz-Hormazábal, I.: The 2010-2015 Megadrought and its influence on the fire regime in central and south-central, *Ecosphere*, 9(8), e02300, doi:<https://doi.org/10.1002/ecs2.2300>, 1730 2018.
- Jódar, J., Urrutia, J., Herrera, C., Custodio, E., Martos-Rosillo, S. and Lambán, L. J.: The catastrophic effects of groundwater intensive exploitation and Megadrought on aquifers in Central Chile: Global change impact projections in water

resources based on groundwater balance modeling, *Sci. Total Environ.*, 914, 169651, doi:<https://doi.org/10.1016/j.scitotenv.2023.169651>, 2024.

- 1735 Miranda, A., Syphard, A. D., Berdugo, M., Carrasco, J., Gómez-Miranda, A., Syphard, A. D., Berdugo, M., Carrasco, J., Gómez-González, S., Ovalle, J. F., Delpiano, C. A., Vargas, S., Squeo, F. A., Miranda, M. D., Dobbs, C., Mentler, R., Lara, A., Garreaud, R., González, S., Ovalle, J. F., Delpiano, C. A., Vargas, S., Squeo, F. A., Miranda, M. D., Dobbs, C., Mentler, R., Lara, A. and Garreaud, R.: Widespread synchronous decline of Mediterranean-type forest driven by accelerated aridity, *Nat Plants*, 9(11), 1810–1817, doi:10.1038/s41477-023-01541-7, 2023.
- 1740 Muñoz, A. A., Klock-Barría, K., Alvarez-Garreton, C., Aguilera-Betti, I., González-Reyes, Á., Lastra, J. A., Chávez, R. O., Barría, P., Christie, D., Rojas-Badilla, M. and Lequesne, C.: Water crisis in petorca basin, Chile: The combined effects of a mega-drought and water management, *Water (Switzerland)*, 12, 648, doi:10.3390/w12030648, 2020.
- Nicolas-Chloé, A., Gustavo, B., Carlos, B. and Noelia, C.: Modes of access to water for domestic use in rural Chile: a typological proposal, *Water Policy*, 24(7), 1179–1194, doi:10.2166/wp.2022.026, 2022.
- 1745 Taucare, M., Viguiet, B., Figueroa, R. and Daniele, L.: The alarming state of Central Chile’s groundwater resources: A paradigmatic case of a lasting overexploitation, *Sci. Total Environ.*, 906, 167723, doi:<https://doi.org/10.1016/j.scitotenv.2023.167723>, 2024.
